# Supplementary material
Source: publisher site journal article supplement (https://www.dovepress.com/article/supplementary_file/617817/617817%20Supplementary%20Material.docx)
Supplement: Supplementary file 1 [file 617817%20Supplementary%20Material.docx]

# **Supplementary Material: Post-hoc Reproducibility and Robustness Analyses**

Scope and verification note. This supplementary document provides additional post-hoc analyses supporting the network results reported in the main manuscript, including the strongest partial-correlation edges, Expected Influence centrality estimates, node redundancy assessment, and case-dropping bootstrap reproducibility analyses. All supplementary results correspond to the final 19-node network estimated in the complete-case sample (N = 90) and should be interpreted in conjunction with the Methods, Results, and Figure Legends presented in the main manuscript.

*Abbreviations used in this supplement: PTSD = post-traumatic stress disorder; PCL-5 = PTSD Checklist for DSM-5; DSM-5 = Diagnostic and Statistical Manual of Mental Disorders, Fifth Edition; EI = Expected Influence; VHAS = Vietnam Health and Aging Study.*

## **S1. Analytic samples**

The study comprised three analytic samples. The full enrolled sample (N = 301) was used for the demographic and trauma-related characteristics. A diagnostic sample (N = 296) the full sample minus five participants with a missing current-PTSD diagnostic determination was used for PTSD prevalence and DSM-5 diagnostic analyses. The complete-case sample (N = 90), comprising participants with complete item-level PTSD symptom data, was used for all network estimation, centrality, and stability analyses reported below.

## **S2. Network estimation framework**

A regularized partial-correlation network (Gaussian Graphical Model) was estimated from the 19 available PCL-5 symptom items using a regularized graphical LASSO. Item D7 was unavailable in the analytic dataset and was excluded, yielding a 19-node network. Node centrality was summarized using Expected Influence (EI). All quantities in Sections S3–S6 derive from this 19-node, complete-case (N = 90) network.

Node codes (PCL-5 items): B1 = intrusive memories; B2 = nightmares; B3 = dissociative reactions (flashbacks); B4 = psychological cue reactivity; B5 = physiological cue reactivity; C1 = avoidance of trauma-related thoughts or feelings; C2 = avoidance of external reminders; D1 = inability to recall key features of the trauma; D2 = persistent negative beliefs about oneself or the world; D3 = distorted cognitions about the cause or consequences of the trauma; D4 = persistent negative emotional state; D5 = markedly diminished interest or participation in activities; D6 = feelings of detachment or estrangement; E1 = irritable behavior or angry outbursts; E2 = reckless or self-destructive behavior; E3 = hypervigilance; E4 = exaggerated startle response; E5 = problems with concentration; E6 = sleep disturbance. Item D7 (inability to experience positive emotions) was excluded.

## **S3. Strongest partial-correlation edges**

*Table S1. The fifteen strongest partial-correlation edges in the 19-node network (N = 90). Edge weights are regularized partial correlations; all retained associations are positive.*

| **Rank** | **Node 1** | **Node 2** | **Edge weight** |
| --- | --- | --- | --- |
| 1 | D3 | E2 | 0.394 |
| 2 | B4 | B5 | 0.326 |
| 3 | C1 | C2 | 0.324 |
| 4 | B1 | B4 | 0.310 |
| 5 | E3 | E4 | 0.287 |
| 6 | D2 | E3 | 0.275 |
| 7 | C1 | D4 | 0.268 |
| 8 | D2 | E2 | 0.267 |
| 9 | D4 | D5 | 0.252 |
| 10 | B2 | B5 | 0.236 |
| 11 | D5 | E5 | 0.223 |
| 12 | D6 | E1 | 0.215 |
| 13 | B1 | E5 | 0.193 |
| 14 | D4 | E6 | 0.183 |
| 15 | B1 | C2 | 0.182 |

## **S4. Expected Influence centrality**

*Table S2. Expected Influence (EI) centrality of the 19 nodes, ranked (N = 90). Higher EI indicates greater interconnectedness with other symptoms in the network.*

| **Rank** | **Node** | **Expected Influence** |
| --- | --- | --- |
| 1 | D4 | 1.306 |
| 2 | C1 | 1.196 |
| 3 | B4 | 1.154 |
| 4 | B2 | 0.982 |
| 5 | B1 | 0.959 |
| 6 | C2 | 0.930 |
| 7 | D5 | 0.894 |
| 8 | E3 | 0.863 |
| 9 | E4 | 0.857 |
| 10 | E5 | 0.849 |
| 11 | E1 | 0.835 |
| 12 | D2 | 0.758 |
| 13 | D3 | 0.738 |
| 14 | B5 | 0.722 |
| 15 | B3 | 0.702 |
| 16 | E6 | 0.664 |
| 17 | E2 | 0.662 |
| 18 | D6 | 0.292 |
| 19 | D1 | 0.189 |

## **S5. Node redundancy assessment**

Node redundancy was examined by correlating the edge-weight profiles of each node pair. The highest profile correlations are shown in Table S3. The maximum observed value (r = 0.591) was well below thresholds for topological overlap, supporting the retention of all 19 nodes as distinct.

*Table S3. Highest edge-profile correlations between node pairs (N = 90).*

| **Node 1** | **Node 2** | **Profile correlation** |
| --- | --- | --- |
| D6 | E1 | 0.591 |
| C2 | D4 | 0.582 |
| D1 | E2 | 0.559 |
| D2 | D3 | 0.553 |
| B1 | B5 | 0.531 |

## **S6. Case-dropping bootstrap reproducibility**

Centrality stability was evaluated with a case-dropping subset bootstrap (1,000 iterations). Table S4 reports the mean Spearman rank correlation between full-sample and subsample Expected Influence rankings as the number of cases dropped. Table S5 reports how often the three most central nodes (D4, C1, B4) were retained among the top-ranked nodes. The three most central nodes remained in the top five in at least 83% of subsamples, even after half of the cases were dropped, indicating that the central-node ranking was reproducible and not attributable to a small number of influential observations.

*Table S4. Mean Spearman rank correlation between the full sample and the case-dropped subsample: Expected Influence rankings (N = 90).*

| **Cases dropped** | **Cases retained** | **Mean Spearman correlation** |
| --- | --- | --- |
| 10% | 81 | 0.928 |
| 20% | 72 | 0.849 |
| 30% | 62 | 0.778 |
| 40% | 54 | 0.714 |
| 50% | 45 | 0.696 |

*Table S5. Percentage of bootstrap subsamples in which each of the three most central nodes was retained among the top three and top five by Expected Influence (N = 90).*

| **Cases dropped** | **D4 in top 3** | **C1 in top 3** | **B4 in top 3** | **D4 in top 5** | **C1 in top 5** | **B4 in top 5** |
| --- | --- | --- | --- | --- | --- | --- |
| 10% | 100.0% | 100.0% | 99.0% | 100.0% | 100.0% | 100.0% |
| 20% | 98.0% | 95.0% | 93.0% | 100.0% | 100.0% | 100.0% |
| 30% | 92.0% | 90.0% | 78.0% | 98.0% | 98.0% | 97.0% |
| 40% | 81.0% | 84.0% | 65.0% | 96.0% | 98.0% | 91.0% |
| 50% | 78.1% | 65.6% | 55.2% | 95.8% | 91.7% | 83.3% |
